# Supplementary material for: Borrelia burgdorferi basic membrane proteins A and B participate in the genesis of Lyme arthritis
Source: PubMed Central journal article supplement — J Exp Med. 2008 Jan 21;205(1):133–41. doi: 10.1084/jem.20070962 (PMC2234379; doi:10.1084/jem.20070962), 2008-01-21
Supplement: jexpmed_jem.20070962_2.pdf [file jexpmed_jem.20070962_2.pdf]

**Table S1.** Oligonucleotide primers used in this study

| Sequence (5' → 3')                        | Purpose                                                                                                                                                                      |
|-------------------------------------------|------------------------------------------------------------------------------------------------------------------------------------------------------------------------------|
| GCTCAAATAAGAGGTTTGC                       | Forward primer for RT-PCR of <i>Borrelia burgdorferi flaB</i>                                                                                                                |
| ATTCCAAGCTCTTCAGCTG                       | Reverse primer for RT-PCR of <i>B. burgdorferi flaB</i>                                                                                                                      |
| TTGCTGATCAAGCTCAATATAACCA                 | Forward primer for qPCR of <i>B. burgdorferi flaB</i>                                                                                                                        |
| TTGAGACCCCTGAAAAGTGATGC                   | Reverse primer for qPCR of <i>B. burgdorferi flaB</i>                                                                                                                        |
| CAGCTGAAGAGCTTGGAAATGCAGCCT               | Probe primer for qPCR of <i>B. burgdorferi flaB</i>                                                                                                                          |
| AGCTGAAGAGCTTGGAAATGC                     | Forward primer for qPCR of <i>B. burgdorferi flaB</i> in human samples                                                                                                       |
| TTGGTTTCTCCAACATGAA                       | Reverse primer for qPCR of <i>B. burgdorferi flaB</i> in human samples                                                                                                       |
| AGAGGGAAATCGTGCCTGAC                      | Forward primer for qPCR of mouse $\alpha$ -actin                                                                                                                             |
| CAATAGTGATGACCTGGCCGT                     | Reverse primer for qPCR of mouse $\alpha$ -actin                                                                                                                             |
| CACTGCCGCATCCTCTTCCTCC                    | Probe primer for qPCR of mouse $\alpha$ -actin                                                                                                                               |
| CAAAGGTTGCCGGCTCTTC                       | Forward primer for RT-PCR of <i>B. burgdorferi bmpA</i>                                                                                                                      |
| CTTCTACCAAGCTTCAAGGTCAG                   | Reverse primer for RT-PCR of <i>B. burgdorferi bmpA</i>                                                                                                                      |
| ATCTACTCAGTATATTGGTAGTTGC                 | Forward primer for qPCR of <i>B. burgdorferi bmpA</i>                                                                                                                        |
| CATGATGAATAATGTCTATCTCATCAG               | Reverse primer for qPCR of <i>B. burgdorferi bmpA</i>                                                                                                                        |
| CCTTGAAGCTGGTAGAAGCGTTGCAACTAG            | Probe primer for qPCR of <i>B. burgdorferi bmpA</i>                                                                                                                          |
| TGGTGATGATGTTGAGATTCC                     | Forward primer for RT-PCR of <i>Borrelia burgdorferi bmpB</i>                                                                                                                |
| TTTGCTGCCTCAATAAACACC                     | Reverse primer for RT-PCR of <i>Borrelia burgdorferi bmpB</i>                                                                                                                |
| agatttccagaaaattattgaagaagt               | Forward primer for qPCR of <i>B. burgdorferi bmpB</i>                                                                                                                        |
| cgatgaaaccaataaagatgcg                    | Reverse primer for qPCR of <i>B. burgdorferi bmpB</i>                                                                                                                        |
| GCTATTTCTGGAGTTTATTCTAGTTATGTTTCAGATCTTGA | Probe primer for qPCR of <i>B. burgdorferi bmpB</i>                                                                                                                          |
| GCGTTCATGATGGTGTGTAA                      | Forward primer for qPCR of <i>B. burgdorferi bmpC</i>                                                                                                                        |
| ATCCTCAGTCATTGCCTCATC                     | Reverse primer for qPCR of <i>B. burgdorferi bmpC</i>                                                                                                                        |
| AAGACCTTATCCTATTGAGGGTAAAAGACTTCTTAC      | Probe primer for qPCR of <i>B. burgdorferi bmpC</i>                                                                                                                          |
| TGGAGGAGTGAGGGGAAAA                       | Forward primer for qPCR of <i>B. burgdorferi bmpD</i>                                                                                                                        |
| GCCGTTGAACGACCAAGT                        | Reverse primer for qPCR of <i>B. burgdorferi bmpD</i>                                                                                                                        |
| AGTGGTCTCTCAATACGTTGGTACA                 | Probe primer for qPCR of <i>B. burgdorferi bmpD</i>                                                                                                                          |
| TTGGAGAC                                  |                                                                                                                                                                              |
| GTGGGCATGACCTTAGAGC                       | Forward primer for qPCR of <i>B. burgdorferi bb0381</i>                                                                                                                      |
| GCAACGCTTCTACCAAGCTTC                     | Reverse primer for qPCR of <i>B. burgdorferi bb0381</i>                                                                                                                      |
| ACGAAATTCCTGGGAGCGAAATTCCTAA              | Forward primer for recombinant BmpA production. A <i>EcoRI</i> site (italicized) is attached for the purpose of cloning                                                      |
| agctcgagttaataaaattctttaagaaa             | Reverse primer for recombinant BmpA production. A <i>XhoI</i> site (italicized) is attached for the purpose of cloning                                                       |
| TTGAAATCGAATCTAGTTCAAAAAAATT              | Forward primer for recombinant BmpB production. A <i>EcoRI</i> site (italicized) is attached for the purpose of cloning                                                      |
| GTCTCGAGTTATAACTTTAATATTGTTT              | Reverse primer for recombinant BmpB production. A <i>XhoI</i> site (italicized) is attached for the purpose of cloning                                                       |
| AAATAGAAATAGGATAGTACGCATCTACTCTTGGGGAGT   | Primer P1, PCR of the left arm for constructing the <i>bmpA/B</i> <sup>-</sup> mutant (5' primer). An <i>XbaI</i> site (italicized) is attached for the purpose of cloning.  |
| TTGAGCTCAGAAGTGCTTTATATGAGAATTGT          | Primer P2, PCR of the left arm for constructing the <i>bmpA/B</i> <sup>-</sup> mutant (3' primer). A <i>SacI</i> site (italicized) is attached for the purpose of cloning.   |
| AACTCGAGCCTTAGGAATTCGCTCCCAAG             | Primer P3, PCR of the right arm for the constructing <i>bmpA/B</i> <sup>-</sup> mutant (5' primer). An <i>XhoI</i> site (italicized) is attached for the purpose of cloning. |
| TTGGTACCAATTGGGCAAAGTATAATGAATGGT         | Primer P4, PCR of the right arm for constructing the <i>bmpA/B</i> <sup>-</sup> mutant (3' primer). A <i>KpnI</i> site (italicized) is attached for the purpose of cloning.  |
| ATGGATTCCAATAGGTTGGTTGATGAA               | Forward primer for constructing the <i>bmpAB</i> complemented isolate. A <i>BamHI</i> site (italicized) is attached for the purpose of cloning into pKFSS1.                  |
| CGGTCGACTTATAACTTTAATATTGTTTTAT           | Reverse primer for constructing the <i>bmpAB</i> complemented isolate. A <i>Sall</i> site (italicized) is attached for the purpose of cloning into pKFSS1.                   |
| AGTGGTCTCTCAATACGTTGGTACA                 | Probe primer for qPCR of <i>B. burgdorferi bmpD</i>                                                                                                                          |
| TTGGAGAC                                  |                                                                                                                                                                              |
